# Supplementary material for: Synthesis of Alginate/Collagen Bioink for Bioprinting Respiratory Tissue Models
Source: MDPI journal article supplement (doi:10.3390/jfb15040090), 2024-04-01
Supplement: s1 [file s1]

Supplementary Material

# Synthesis of Alginate/Collagen Bioink for Bioprinting Respiratory Tissue Models

Amanda Zimmerling <sup>1,2,\*</sup>, Yan Zhou <sup>2</sup> and Xiongbiao Chen <sup>1,3,\*</sup>

<sup>1</sup> Division of Biomedical Engineering, College of Engineering, University of Saskatchewan, 57 Campus Dr., Saskatoon, SK S7N 5A9, Canada

<sup>2</sup> Vaccine and Infectious Disease Organization (VIDO), University of Saskatchewan, Saskatoon, SK S7N 5E3, Canada; yan.zhou@usask.ca

<sup>3</sup> Department of Mechanical Engineering, College of Engineering, University of Saskatchewan, Saskatoon, SK S7N 5A9, Canada

\* Correspondence: asz694@usask.ca (A.Z.); xbc719@usask.ca (X.C.)

**Table S1.** Herschel-Bulkely Fluid flow model fits for all rheological tests.

| Material                    | $\tau_0$ | $K$  | $n$ | $R^2$ | RMSE |
|-----------------------------|----------|------|-----|-------|------|
| 4% Alginate 25°C            | 1.3E-06  | 17.5 | 0.8 | 0.99  | 39.8 |
| 4% Alginate 35°C            | 2.2E-04  | 24.8 | 0.7 | 1.00  | 18.8 |
| 4% Alginate 45°C            | 6.8E-06  | 9.6  | 0.8 | 1.00  | 26.7 |
| 4:1 Alginate: Collagen 25°C | 5.9E-03  | 2.7  | 0.8 | 1.00  | 2.8  |
| 4:1 Alginate: Collagen 35°C | 2.4E-07  | 2.7  | 0.8 | 1.00  | 3.7  |
| 4:1 Alginate: Collagen 45°C | 1.6E-07  | 2.3  | 0.8 | 1.00  | 3.3  |
| 3:1 Alginate: Collagen 25°C | 6.7E+00  | 3.4  | 0.8 | 1.00  | 3.2  |
| 3:1 Alginate: Collagen 35°C | 1.1E-08  | 2.9  | 0.7 | 1.00  | 4.2  |
| 3:1 Alginate: Collagen 45°C | 7.2E-08  | 1.9  | 0.8 | 1.00  | 3.4  |
| 2:1 Alginate: Collagen 25°C | 1.1E-02  | 2.9  | 0.8 | 1.00  | 3.5  |
| 2:1 Alginate: Collagen 35°C | 4.2E-06  | 2.7  | 0.7 | 1.00  | 4.0  |
| 2:1 Alginate: Collagen 45°C | 2.5E-14  | 1.8  | 0.8 | 1.00  | 2.8  |
| 1:1 Alginate: Collagen 25°C | 6.4E+00  | 2.7  | 0.7 | 1.00  | 2.6  |
| 1:1 Alginate: Collagen 35°C | 4.5E+00  | 3.2  | 0.6 | 1.00  | 2.1  |
| 1:1 Alginate: Collagen 45°C | 5.5E+00  | 1.4  | 0.8 | 0.98  | 2.6  |

**Citation:** Zimmerling, A.; Zhou, Y.; Chen, X. Synthesis of Alginate/Collagen Bioink for Bioprinting Respiratory Tissue Models. *J. Funct. Biomater.* **2024**, *15*, 90.

<https://doi.org/10.3390/jfb15040090>

Academic Editor: Dennis

Douroumis

Received: 26 February 2024

Revised: 17 March 2024

Accepted: 29 March 2024

Published: 1 April 2024

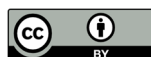

**Copyright:** © 2024 by the authors.

Licensee MDPI, Basel,

Switzerland. This article is an open

access article distributed under the

terms and conditions of the Creative

Commons Attribution (CC BY)

license ([https://](https://creativecommons.org/licenses/by/4.0/)

[creativecommons.org/licenses/](https://creativecommons.org/licenses/by/4.0/)

[by/4.0/](https://creativecommons.org/licenses/by/4.0/)).

**Disclaimer/Publisher's Note:** The statements, opinions and data contained in all publications are solely those of the individual author(s) and contributor(s) and not of MDPI and/or the editor(s). MDPI and/or the editor(s) disclaim responsibility for any injury to people or property resulting from any ideas, methods, instructions or products referred to in the content.
